# Supplementary material for: Circulating microbial content in myeloid malignancy patients carries diagnostic and prognostic potential
Source: Research Square preprint supplement (doi:10.21203/rs.3.rs-380836/v1), 2021-04-13
Supplement: Supplementary file 1 [file 6c46bc76873ab8effe8d8039.xlsx]

## Sheet: Supplementary Table 2
SUPPLEMENTARY TABLE 2
Patient ID	chromosome	bp (hg19)	gene
MLL_14752	1	8833440	RERE
MLL_11441	1	10404380	KIF1B
MLL_17448	1	168290295	NA
MLL_11901	2	11355816	ROCK2
MLL_22993	2	33141266	LINC00486
MLL_27228	2	33141419	LINC00486
MLL_30887	2	75449256	NA
MLL_11441	2	132575858	NA
MLL_11441	3	4035386	NA
MLL_11441	3	13417555	NUP210
MLL_14752	4	49514513	NA
MLL_11441	4	148100486	NA
MLL_11441	5	900879	TRIP13
MLL_11441	5	140891739	PCDHGA11
MLL_14752	5	150401910	GPX3
MLL_11441	5	165548036	NA
MLL_11556	6	36514956	STK38
MLL_10863	7	24801660	NA
MLL_11441	8	70507047	SULF1
MLL_11441	8	101685534	NA
MLL_17861	9	74217724	NA
MLL_12448	10	12404819	CAMK1D
MLL_10863	10	86978200	NA
MLL_11441	11	43153883	NA
MLL_15973	11	61847819	NA
MLL_32458	12	9568669	NA
MLL_15738	12	18508618	PIK3C2G
MLL_18542	12	50364523	NA
MLL_14752	12	99085832	APAF1
MLL_11441	13	66358550	NA
MLL_11441	14	19634451	NA
MLL_11441	15	46845165	NA
MLL_11441	16	72967057	ZFHX3
MLL_27228	17	26383218	NLK
MLL_18224	17	49341044	UTP18
MLL_11441	17	56736661	TEX14
MLL_29546	18	1274094	LINC00470
MLL_11441	20	52318330	NA
MLL_11556	20	59020897	NA
MLL_16023	22	39717384	NA
MLL_14752	23	18179603	NA
MLL_11901	23	100331680	NA
MLL_10858	23	108173960	NA
